# Supplementary material for: Discovery, Validation, and Target Prediction of Antibacterial and Antidiabetic Components of Archidendron clypearia Based on a Combination of Multiple Analytical Methods
Source: MDPI journal article supplement (doi:10.3390/molecules28031329), 2023-01-30

Figure S1. Total ion current of *A. clypearia*.

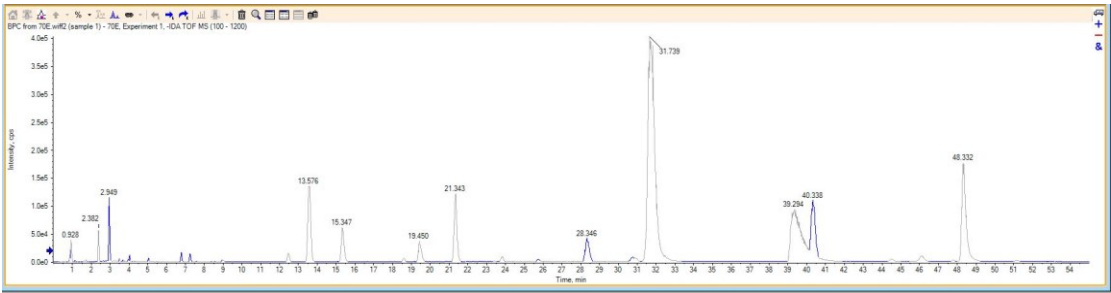

Figure S2. Antibacterial zone of different polarity extracts.

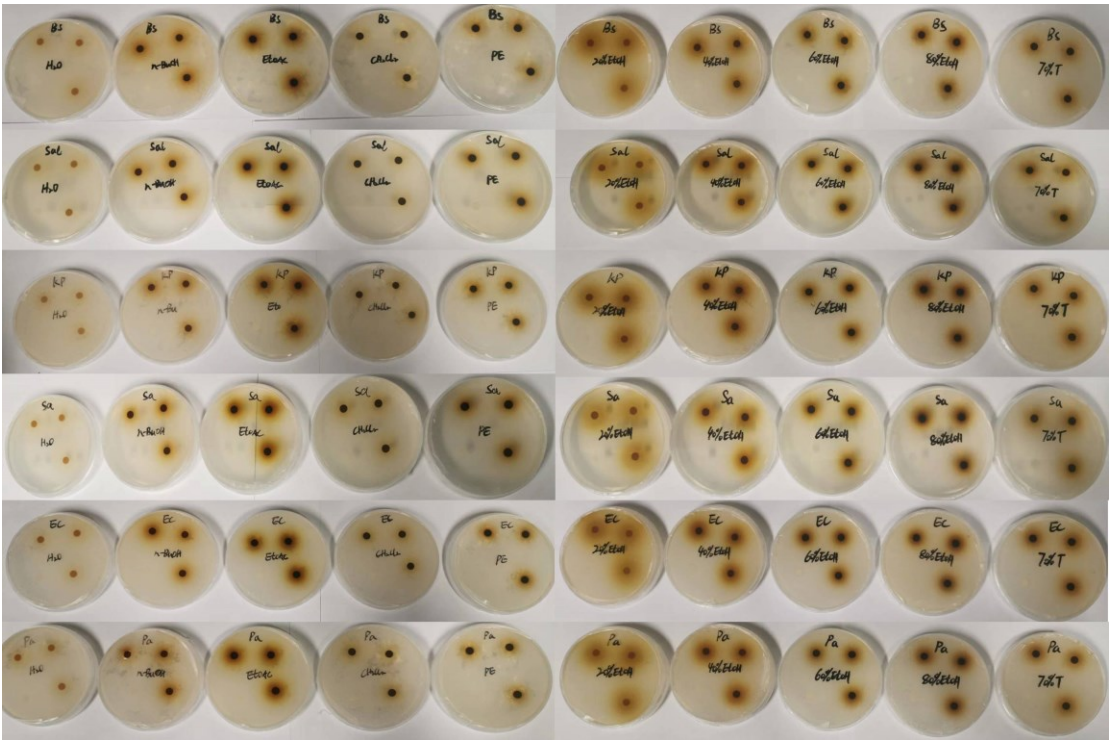

Table S1. Quantitative peak areas of different polarity extracts of *A. clypearia*.

| Peak | Retention<br>time (min) | S1      | S2    | S3     | S4      | S5      | S6      | S7       | S8     | S9     | S10   |
|------|-------------------------|---------|-------|--------|---------|---------|---------|----------|--------|--------|-------|
| P1   | 0.82                    | 82.86   | 24.75 | 15.49  | 0.01    | 71.72   | 377.44  | 0.01     | 0.01   | 0.01   | 0.01  |
| P2   | 1.19                    | 116.00  | 22.72 | 22.80  | 0.01    | 287.59  | 476.74  | 40.61    | 19.29  | 0.01   | 0.01  |
| P3   | 2.40                    | 90.85   | 0.01  | 0.01   | 0.01    | 367.51  | 154.04  | 0.01     | 71.51  | 0.01   | 0.01  |
| P4   | 2.93                    | 1086.01 | 66.44 | 203.41 | 1751.52 | 2430.00 | 1108.64 | 13748.24 | 106.53 | 129.33 | 35.46 |
| P5   | 6.74                    | 52.65   | 0.01  | 0.01   | 32.35   | 306.63  | 16.41   | 378.59   | 79.47  | 0.01   | 0.01  |
| P6   | 8.73                    | 88.20   | 0.01  | 0.01   | 138.54  | 257.20  | 67.57   | 163.96   | 446.59 | 15.01  | 0.01  |
| P7   | 12.04                   | 55.67   | 10.10 | 0.01   | 142.39  | 31.02   | 0.01    | 0.01     | 780.41 | 0.01   | 0.01  |

|     |       |         |         |         |         |         |      |         |         |          |          |
|-----|-------|---------|---------|---------|---------|---------|------|---------|---------|----------|----------|
| P8  | 13.15 | 648.17  | 92.23   | 2872.28 | 972.67  | 52.53   | 0.01 | 6586.68 | 46.31   | 113.05   | 74.30    |
| P9  | 14.63 | 331.38  | 106.40  | 54.00   | 698.76  | 39.91   | 0.01 | 0.01    | 1887.82 | 20.96    | 0.01     |
| P10 | 18.34 | 144.69  | 68.05   | 19.95   | 342.71  | 52.23   | 0.01 | 0.01    | 180.53  | 731.56   | 118.82   |
| P11 | 20.16 | 579.69  | 167.32  | 90.10   | 1262.40 | 86.37   | 0.01 | 0.01    | 3549.26 | 0.01     | 0.01     |
| P12 | 21.85 | 83.48   | 46.17   | 0.01    | 171.31  | 87.55   | 0.01 | 0.01    | 505.54  | 379.46   | 201.38   |
| P13 | 26.00 | 434.33  | 153.28  | 67.05   | 824.10  | 223.21  | 0.01 | 1154.72 | 1859.36 | 193.74   | 180.88   |
| P14 | 27.95 | 175.63  | 106.56  | 37.61   | 359.39  | 173.15  | 0.01 | 416.05  | 993.21  | 53.92    | 0.01     |
| P15 | 28.61 | 5039.51 | 3798.64 | 1395.18 | 9929.17 | 605.20  | 0.01 | 0.01    | 6544.58 | 6220.48  | 598.54   |
| P16 | 35.65 | 3496.74 | 3897.21 | 760.47  | 5784.94 | 1138.35 | 0.01 | 0.01    | 0.01    | 10347.93 | 19192.71 |
| P17 | 37.05 | 1020.22 | 439.11  | 246.98  | 1920.70 | 171.38  | 0.01 | 2064.04 | 5108.76 | 0.01     | 0.01     |
| P18 | 42.10 | 49.31   | 84.12   | 16.42   | 139.57  | 15.97   | 0.01 | 0.01    | 0.01    | 619.14   | 113.83   |
| P19 | 43.75 | 123.02  | 149.05  | 37.98   | 295.91  | 57.40   | 0.01 | 0.01    | 29.63   | 515.16   | 692.83   |
| P20 | 46.45 | 2192.89 | 2482.20 | 512.48  | 3691.65 | 758.01  | 0.01 | 0.01    | 0.01    | 6729.72  | 12345.21 |

**Table S2.** Method validation results of UPLC.

| Peaks | RSD (%)   |              |           |
|-------|-----------|--------------|-----------|
|       | precision | repitability | stability |
| P1    | 0.26      | 3.68         | 1.11      |
| P2    | 0.66      | 1.93         | 1.92      |
| P3    | 2.12      | 3.20         | 2.82      |
| P4    | 0.35      | 2.27         | 1.28      |
| P5    | 0.54      | 1.72         | 1.37      |
| P6    | 0.38      | 2.87         | 0.79      |
| P7    | 1.59      | 1.89         | 1.95      |
| P8    | 0.80      | 2.30         | 2.13      |
| P9    | 1.02      | 2.15         | 1.27      |
| P10   | 3.11      | 3.77         | 1.03      |
| P11   | 0.29      | 0.80         | 0.29      |

|     |      |      |      |
|-----|------|------|------|
| P12 | 2.24 | 3.22 | 3.60 |
| P13 | 0.80 | 3.05 | 0.75 |
| P14 | 1.66 | 3.17 | 2.15 |
| P15 | 0.31 | 0.98 | 0.37 |
| P16 | 0.32 | 1.78 | 0.59 |
| P17 | 0.95 | 1.49 | 1.73 |
| P18 | 1.52 | 1.25 | 2.74 |
| P19 | 2.04 | 2.65 | 3.76 |
| P20 | 0.25 | 2.68 | 0.58 |

**Table S3.** MIC values of the *A. clypearia* extracts.

| Batch | MIC (mg/mL)       |                          |                              |                         |                              |                               |
|-------|-------------------|--------------------------|------------------------------|-------------------------|------------------------------|-------------------------------|
|       | <i>Salmonella</i> | <i>Bacillus subtilis</i> | <i>Klebsiella pneumoniae</i> | <i>Escherichia coli</i> | <i>Staphylococcus aureus</i> | <i>Pseudomonas aeruginosa</i> |
| S1    | 1.56              | 0.78                     | 0.78                         | 0.20                    | 0.78                         | 0.78                          |
| S2    | 1.56              | 1.56                     | 1.56                         | 1.56                    | 1.56                         | 0.78                          |
| S3    | 1.56              | 0.78                     | 0.78                         | 0.39                    | 3.12                         | >3.12                         |
| S4    | 0.78              | 0.78                     | 0.39                         | 0.20                    | 1.56                         | 0.39                          |
| S5    | >3.12             | >3.12                    | 1.56                         | >3.12                   | >3.12                        | >3.12                         |
| S6    | >3.12             | >3.12                    | >3.12                        | >3.12                   | >3.12                        | >3.12                         |
| S7    | >3.12             | 3.12                     | >3.12                        | >3.12                   | >3.12                        | >3.12                         |
| S8    | 1.56              | 0.78                     | 0.39                         | 0.20                    | 1.56                         | 0.39                          |
| S9    | 1.56              | 0.39                     | 0.39                         | 0.20                    | 1.56                         | 0.39                          |
| S10   | 0.78              | 0.78                     | 0.39                         | 0.20                    | 0.78                         | 0.39                          |

**Table S4.** IC<sub>50</sub> values of the six isolated compounds for  $\alpha$ -glucosidase and  $\alpha$ -amylase

| Compound                         | IC <sub>50</sub> ( $\mu$ g/ml) |                       |
|----------------------------------|--------------------------------|-----------------------|
|                                  | $\alpha$ -Amylase              | $\alpha$ -glucosidase |
| Gallic acid (P4)                 | >800                           | >800                  |
| Ethyl gallate (P8)               | >800                           | 97.99 $\pm$ 8.85      |
| gallocatechin-7-gallate<br>(P9)  | 383.93 $\pm$ 24.38             | 13.56 $\pm$ 1.07      |
| 7-O-galloyltricetifavan<br>(P15) | 177.50 $\pm$ 17.72             | 2.87 $\pm$ 0.13       |
| Myricitrin (P13)                 | >800                           | 50.81 $\pm$ 1.67      |
| Quercitrin (P17)                 | >800                           | 48.87 $\pm$ 3.15      |

**Extraction and isolation method of six compounds:**

The dried leaves and twigs of *A. clypearia* (50 g) were extracted using 2000 mL of 70% EtOH for 40 min by ultrasonication to obtain 20 g of crude extract. The sample was chromatographed on a polyamide column (200–300 mesh) with a gradient of increasing polarity of a solvent system comprising EtOH and H<sub>2</sub>O (20:80, 40:60, 60:40, and 80:20, v/v) to yield four fractions (A–D). Fraction A was separated using ODS gel column chromatography (CC) and eluted with MeOH–H<sub>2</sub>O (20:80, v/v) to give compounds 1 (18mg, P4) and 2 (15mg, P8). Fraction B was further fractionated by polyamide gel CC (200–300 mesh) with a step gradient of EtOH–H<sub>2</sub>O (from 20:80 to 50:50, v/v) to yield fractions B1 and B2. Fraction B1 was then passed over ODS gel CC and eluted with mixtures of MeOH–H<sub>2</sub>O (30:70, v/v) to yield compounds 3 (8mg, P13) and 4 (10mg, P17); fraction B2 was separated on ODS gel CC with MeOH–H<sub>2</sub>O (20: 80, v/v) as an eluent and then purified by reversed-phase (RP) preparative high-performance liquid chromatography (HPLC) (1 mL/min) to obtain compound 5 (12mg, P9) and compound 6 (24mg, P15).

**Spectroscopic data of the isolated compounds are below:**

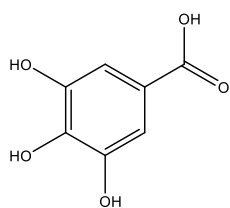

Compound 1: white amorphous solid; ESI-MS:  $m/z$  169  $[M - H]^-$ . According to the data and compared with the standard sample, compound 1 was determined to be gallic acid.

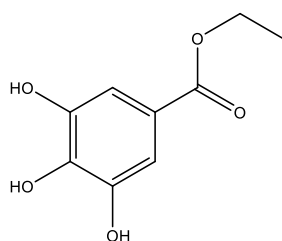

Compound 2: white amorphous solid; ESI-MS:  $m/z$  197  $[M - H]^-$ . According to the data and compared with the standard sample, compound 2 was determined to be ethyl gallate.

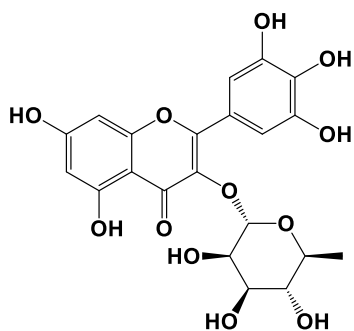

Compound 3: yellow amorphous solid; ESI-MS:  $m/z$  463  $[M - H]^-$ . According to the data and compared with the standard sample, compound 4 was determined to be myricitrin.

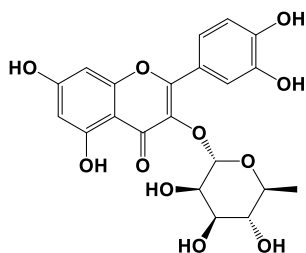

Compound 4: yellow amorphous solid; ESI-MS:  $m/z$  447  $[M - H]^-$ . According to the data and compared with the standard sample, compound 6 was determined to be quercitrin.

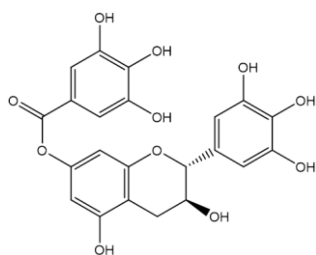

Compound 5: white amorphous solid; ESI-MS:  $m/z$  457  $[M - H]^-$ ,  $[\alpha]^{20}_D +18.87$  (c 0.5, MeOH),  **$^1H$  NMR (500 MHz, DMSO)**  $\delta$  7.05 (s, 2H), 6.26 (d,  $J = 0.6$  Hz, 2H), 6.19 (d,  $J = 2.3$  Hz, 1H), 6.12 (d,  $J = 2.3$  Hz, 1H), 4.58 (d,  $J = 6.6$  Hz, 1H), 3.89 (q,  $J = 6.4$  Hz, 1H), 2.68 (dd,  $J = 16.4, 5.1$  Hz, 1H), 2.47 (d,  $J = 7.2$  Hz, 1H).  **$^{13}C$  NMR (126 MHz, DMSO)**  $\delta$  166.47, 158.14, 157.10, 151.79, 147.80, 147.76, 141.41, 134.63, 131.52, 111.05, 107.83, 107.62, 102.64, 102.34, 83.20, 67.81, 29.09. According to the data and reported literature values [1, 2], compound 3 was determined to be gallocatechin-7-gallate.

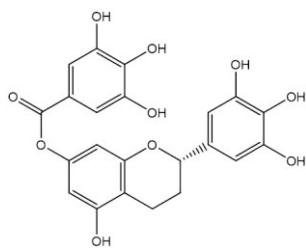

Compound 6: white amorphous solid; ESI-MS:  $m/z$  441  $[M - H]^-$ ,  $[\alpha]^{20}_D -4.22$  (c 0.5, MeOH),  **$^1H$  NMR (500 MHz, DMSO)**  $\delta$  7.05 (s, 2H), 6.32 (s, 2H), 6.18 (d,  $J = 2.3$  Hz, 1H), 6.10 (d,  $J = 2.3$  Hz, 1H), 4.79 (dd,  $J = 9.9, 2.2$  Hz, 1H), 2.65 – 2.53 (m, 2H), 2.11 – 2.01 (m, 1H), 1.90 – 1.76 (m, 1H).  **$^{13}C$  NMR (126 MHz, DMSO)**  $\delta$  166.47, 158.09, 157.99, 151.64, 147.92, 147.76, 141.16, 134.56, 133.60, 120.49, 111.07, 109.00, 107.10, 102.87, 102.47, 79.02, 30.65, 21.14. According to the data and reported literature values [1], compound 5 was determined to be 7-O-galloyltricetifavan.

## References

1. Kang, J.; Liu, C.; Wang, H.; Li, B.; Li, C.; Chen, R.; Liu, A. Studies on the bioactive flavonoids isolated from *Pithecellobium clypearia* Benth. *Molecules* **2014**, *19*, 4479–4490, doi:10.3390/molecules19044479.
2. Maldini, M.; Montoro, P.; Hamed, A.I.; Mahalel, U.A.; Oleszek, W.; Stochmal, A.; Piacente, S. Strong antioxidant phenolics from *Acacia nilotica*: Profiling by ESI-MS and qualitative-quantitative determination by LC-ESI-MS. *Journal of Pharmaceutical and Biomedical Analysis* **2011**, *56*, 228–239, doi:10.1016/j.jpba.2011.05.019.

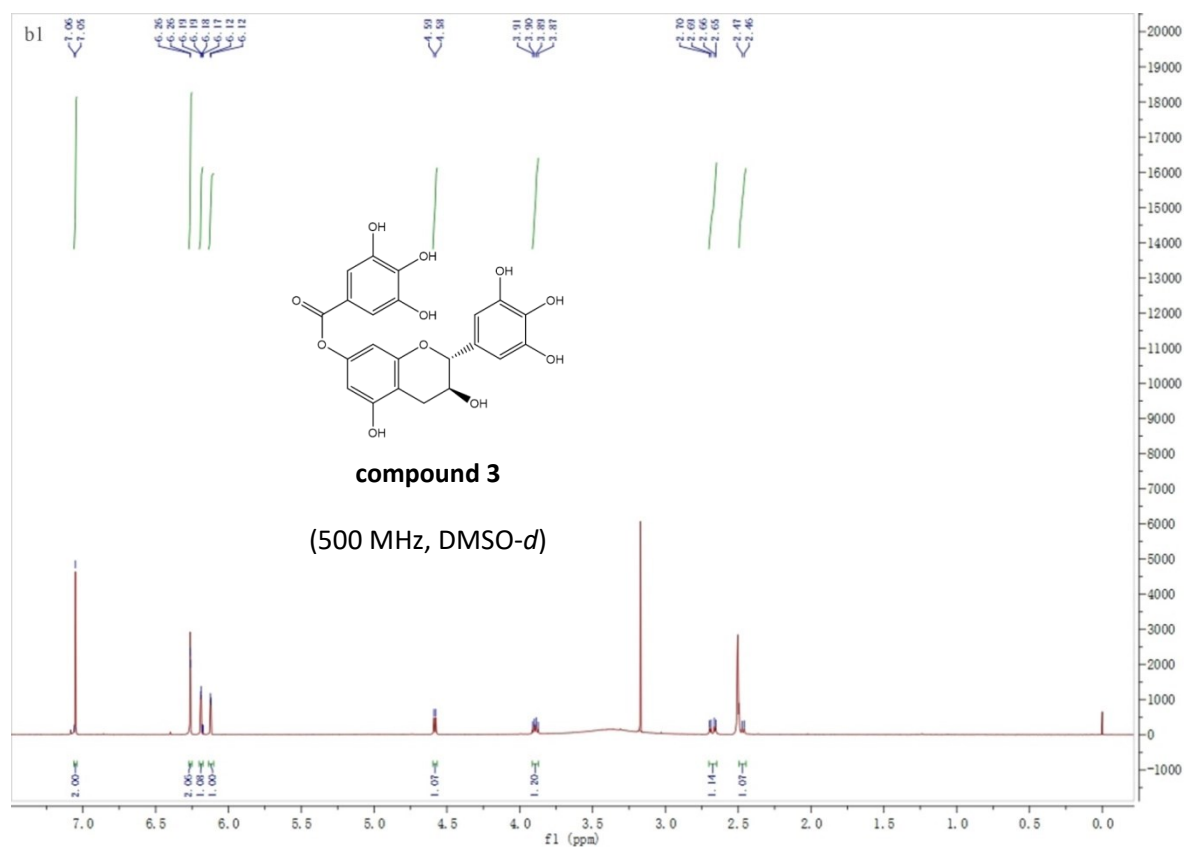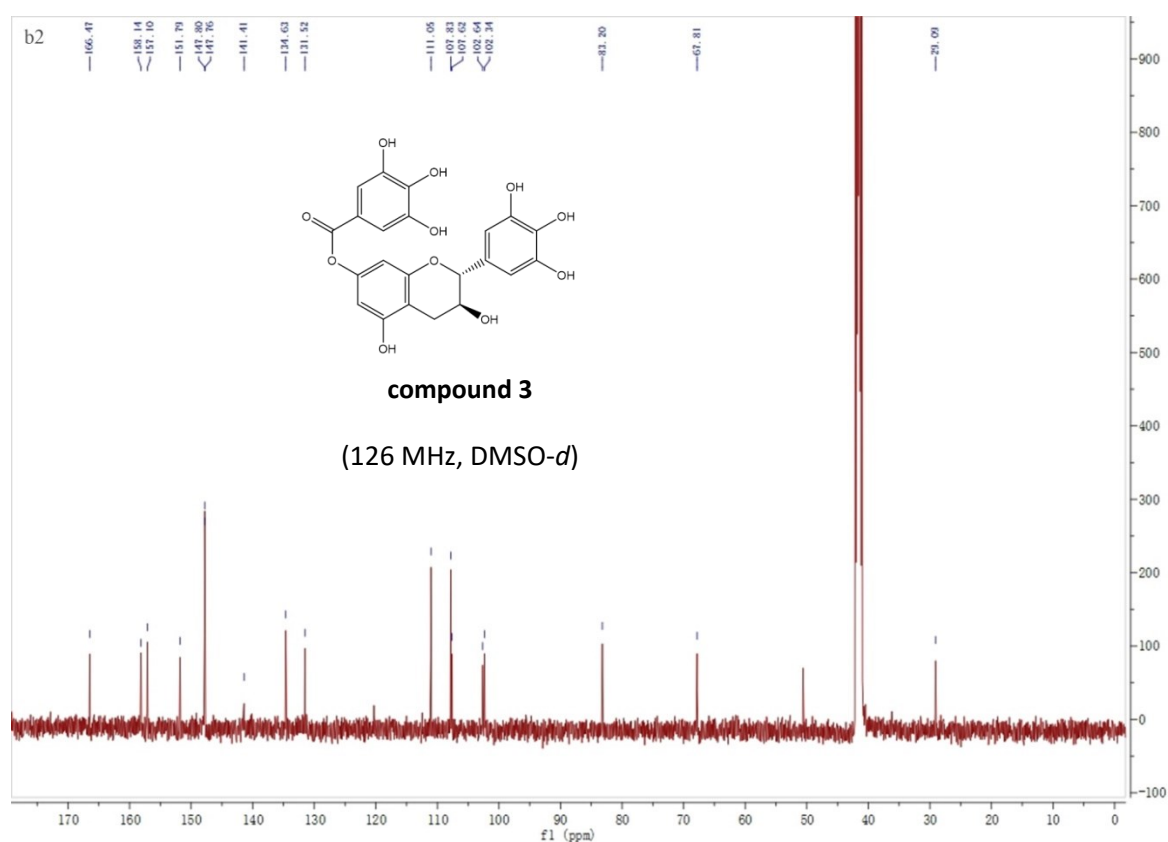

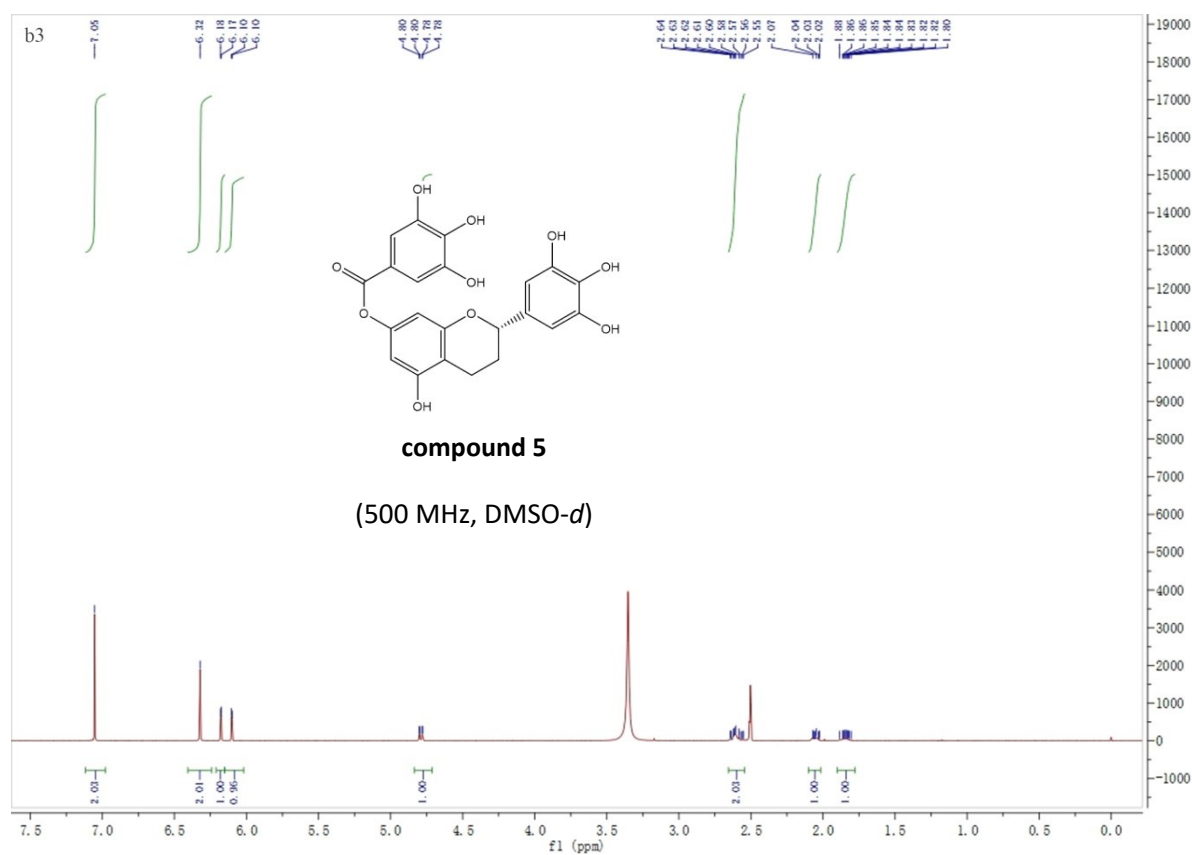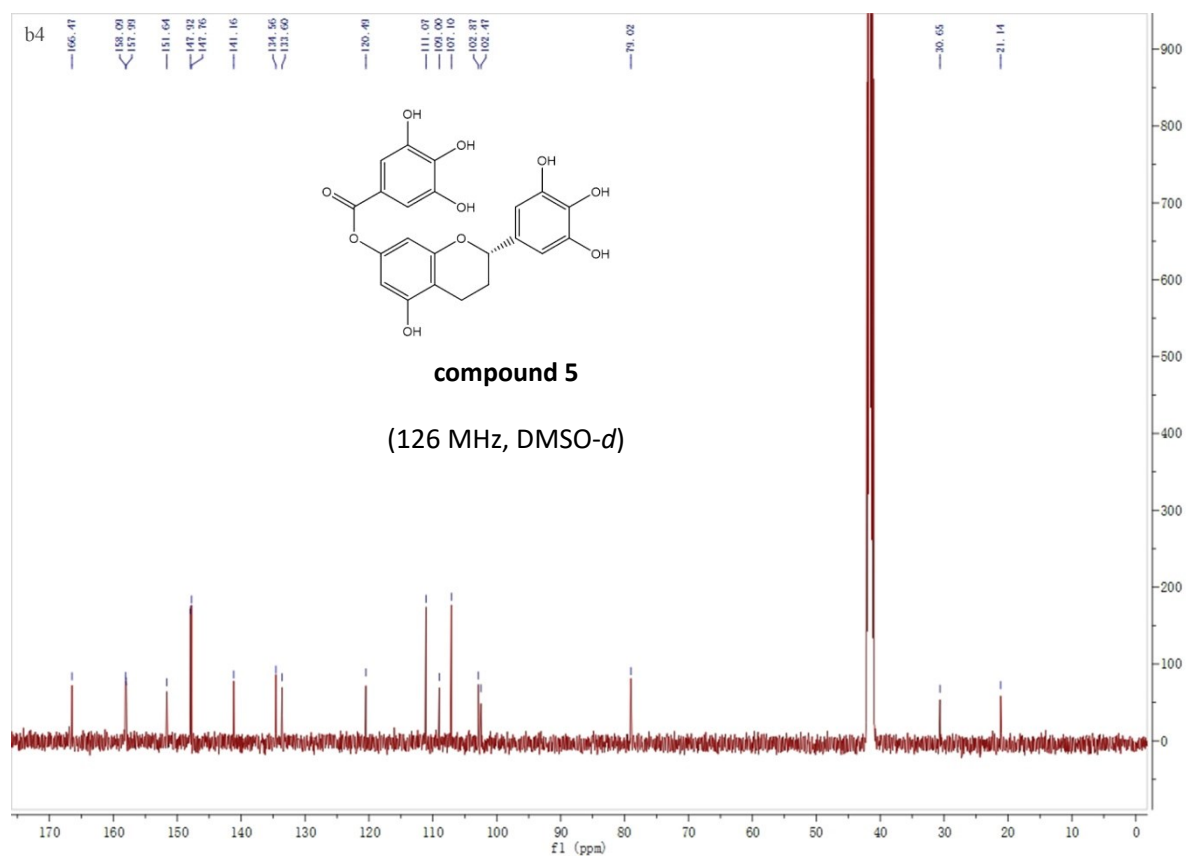

Supplement: s1 [file s1]
